# Supplementary material for: Colorimetric monitoring of serum dopamine with promotion activity of gold nanocluster-based nanozymes
Source: Royal Society of Chemistry journal article supplement (doi:10.1039/d1an01511g), 2021-01-01
Supplement: d1an01511g1.pdf [file d1an01511g1.pdf]

# Supporting information

## Colorimetric monitoring of serum dopamine with promotion activity of gold nanoclusters-based nanozymes

Qian Ma <sup>a,b</sup>, Juan Qiao <sup>a,c</sup>, Yufei Liu <sup>b</sup>, Li Qi <sup>\* a,c</sup>

<sup>a</sup> Beijing National Laboratory for Molecular Sciences; Key Laboratory of Analytical Chemistry for Living Biosystems, Institute of Chemistry, Chinese Academy of Sciences, Beijing 100190, P.R. China

<sup>b</sup> School of Pharmacy, Xinxiang Medical University , Xinxiang 453003, P. R. China

<sup>c</sup> School of Chemical Sciences, University of Chinese Academy of Sciences, Beijing 100049, P. R. China

**\* Correspondence author:**

**qili@iccas.ac.cn**

## Experiments

### *Materials and chemicals*

Dopamine (DA) was supplied Alfa Aesar Chemicals Co. Ltd. (Shanghai, China). Papain was gotten from Sangon Biotech Co., Ltd. (Shanghai, China).  $\text{HAuCl}_4$  was bought from Shenyang Jinke Reagent Factory (Shenyang, China). Sodium acetate (NaAc) was gotten from Beijing Yili Fine Chemicals Co., Ltd. (Beijing, China). Zinc sulfate ( $\text{ZnSO}_4$ ) and magnesium chloride ( $\text{MgCl}_2$ ) were obtained from Aladdin Chemistry Company (Shanghai, China). L-Amino acids (L-AAs) were purchased from TCI Shanghai Co. Ltd. (Shanghai, China). Hydrogen peroxide ( $\text{H}_2\text{O}_2$ , 30.0%, w/w), 3, 3', 5, 5'-tetramethylbenzidine (TMB), 5,5'-dimethyl pyrroline *N*-oxide (DMPO) and other chemicals were purchased from Beijing Innochem Technology Co. Ltd. (Beijing, China). The aqueous solutions were prepared with Milli-Q water (Millipore, Bedford, MA, USA).

### *Instruments*

The ultraviolet-visible (UV-*vis*) absorption spectra were recorded using a TU-1900 UV-*vis* double-beam spectrometer (Purkinje General, China). A 1.0 mL capacity cuvette with a 1.0 cm path length was used for measuring the UV-*vis* absorbance.

The fluorescence measurements were performed using an F-4600 fluorescence spectrophotometer (Hitachi, Japan).

Fourier transform infrared (FT-IR) spectra were recorded by an FT-IR spectrophotometer (TENSOR-27, Germany).

The zeta potential measurements were carried out with a Zetasizer laser particle analyser (Zetasizer Nano ZS ZEN3600, British).

X-ray photoelectron spectroscopy (XPS) measurements were performed by an ESCALab220i-XL spectrometer (VG Scientific, U.K.).

Transmission electron microscopy (TEM) images were obtained using a transmission electron microscope (JEM-2010, Japan electron optics laboratory, Japan) at a voltage of 200 kV.

Electron paramagnetic resonance (EPR) signals were measured by a Bruker ESP 300E spectrometer (Bruker, Rheinstetten, Germany) with a microwave bridge (receiver gain,  $1 \times 10^5$ ; modulation amplitude, 2 Gauss; microwave power, 10 mW; modulation frequency, 100 kHz). A sample containing 0.1 M DMPO was transferred to a quartz capillary tube and placed in the EPR cavity. Under the UV-irradiation at 355 nm, EPR signals were detected using DMPO as the spin trap.

### ***Preparation of P@AuNCs***

All of the glasswares were washed with aqua regia (HCl:HNO<sub>3</sub> volume ratio = 3:1) and rinsed with ultrapure water. The P@AuNCs was prepared with papain as the reducing and capping agent. Simply, in a 20.0 mL-glass flask, 2.5 mL of HAuCl<sub>4</sub> (10.0 mM) and 2.5 mL of papain (2.0 mM) aqueous solutions were added and mixed under gentle stirring at 100 °C for 10 min. The P@AuNCs solution was centrifuged to remove the larger particles at 10,000 rpm for 10 min. Finally, the P@AuNCs supernatant was collected and stored at 4 °C for further use.

### ***DA testing***

DA standard solutions (0.2-2.5 mM) were prepared. DA solution (30.0 µL, 1.0 mM), P@AuNCs solution (150.0 µL), TMB (36.0 µL, 25.0 mM) and H<sub>2</sub>O<sub>2</sub> (90.0 µL, 10.0 M) was mixed with sodium acetate buffer solution (2.72 mL, 12.0 mM, pH 3.0). The mixture was incubated at 25 °C for 20 min before conducting the UV-*vis* absorption measurements.

### ***Metabolic assay of DA in rat serum***

Three male-Sprague-Dawley-rats (about 250 g) were gotten from Beijing Vital River Laboratory Animal Technology Co. Ltd. (Beijing, China).

The controlled blank serum samples and five different serum samples (at 0 h, 0.5 h, 1.0 h, 2.0 h, 4.0 h, 6.0) were collected after 7.6 mg/kg DA dissolved in physiological saline solution was injected into the abdominal cavity of rats. The rat serum samples were pre-treated to eliminate the interferences-proteins. Simply, 0.1 mL of the fresh rat serum samples was diluted by 0.1 mL of water, which was heated in a water-bath to boil for 20 min. Consequently, the samples were centrifuged at 10,000 rpm for 10 min and the supernatant was collected and stored at 4 °C for further analysis.

The proposed colorimetric P@AuNCs-TMB-H<sub>2</sub>O<sub>2</sub> system was applied to determination of DA in the rat serum samples. 30.0 µL rat serums, P@AuNCs solution (150.0 µL), TMB (36.0 µL, 25.0 mM), H<sub>2</sub>O<sub>2</sub> (90.0 µL, 10.0 M) and acetate buffer (2.72 mL, 12.0 mM, pH 3.0) were mixed. After the mixture was mixed and incubated at 25 °C for 10 min, the UV-*vis* absorption measurements were conducted.

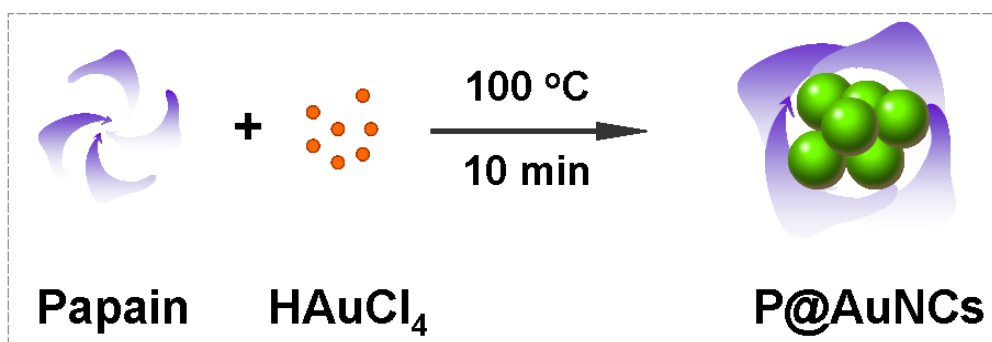

**Fig. S1.** Schematic diagram of the synthesis process of P@AuNCs.

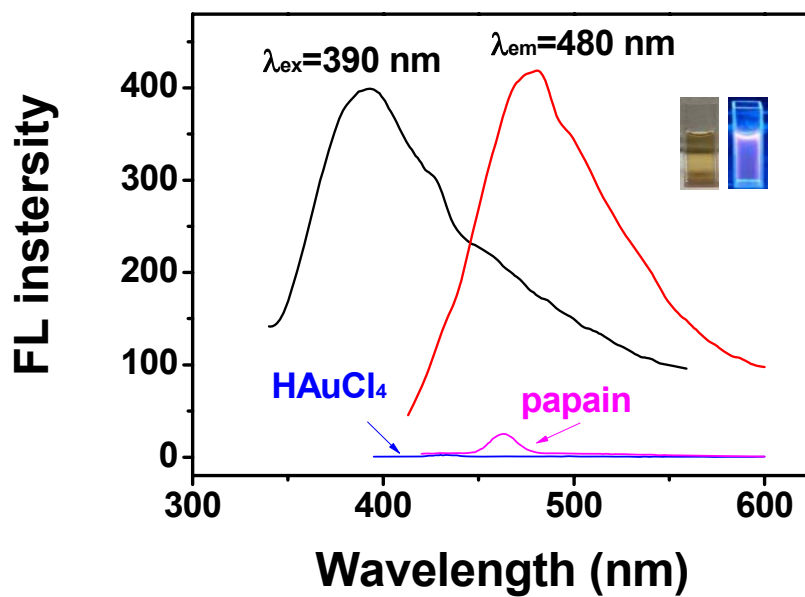

**Fig. S2.** The fluorescence spectra of the obtained P@AuNCs recorded with an emission wavelength at 480 nm under excitation at 390 nm. Inset: photograph of the P@AuNCs under visible light (left) and UV light (right).

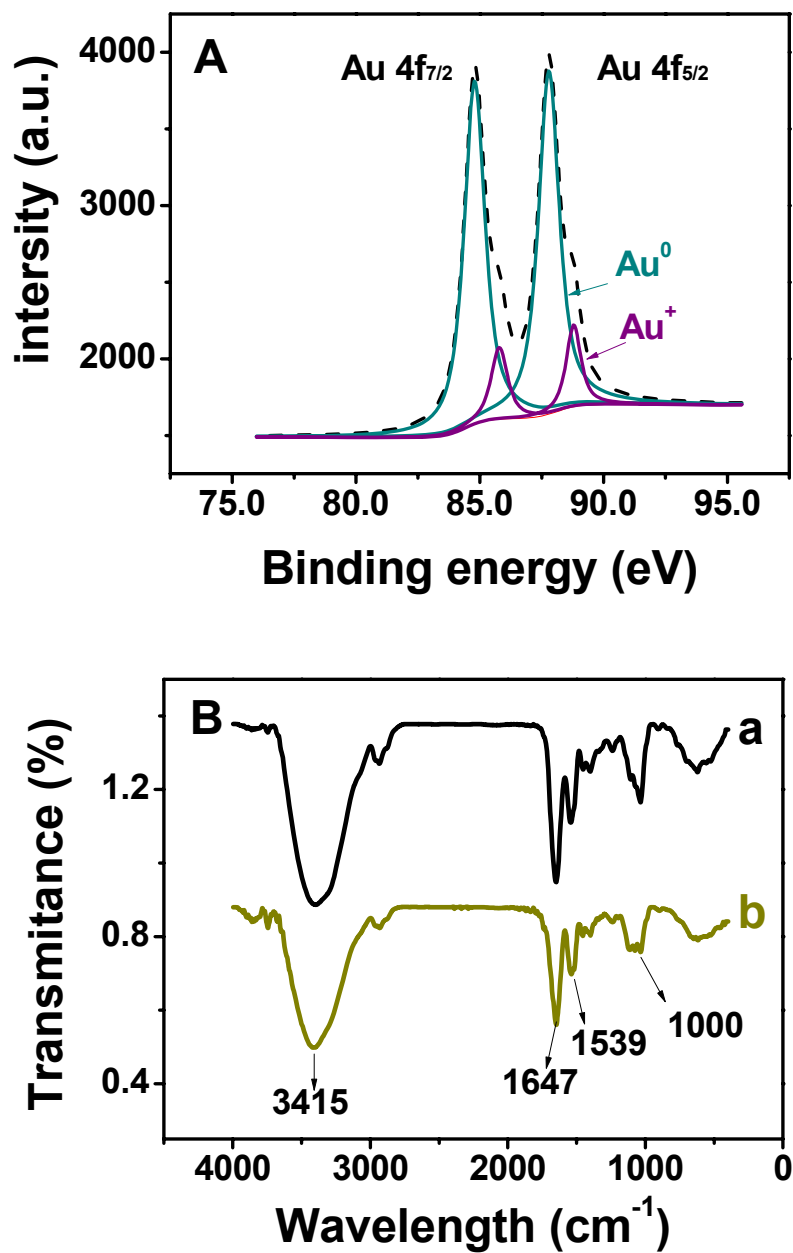

**Fig. S3.** (A) XPS spectra of Au 4f orbitals of P@AuNCs; (B) FT-IR spectra of papain (a) and P@AuNC (b).

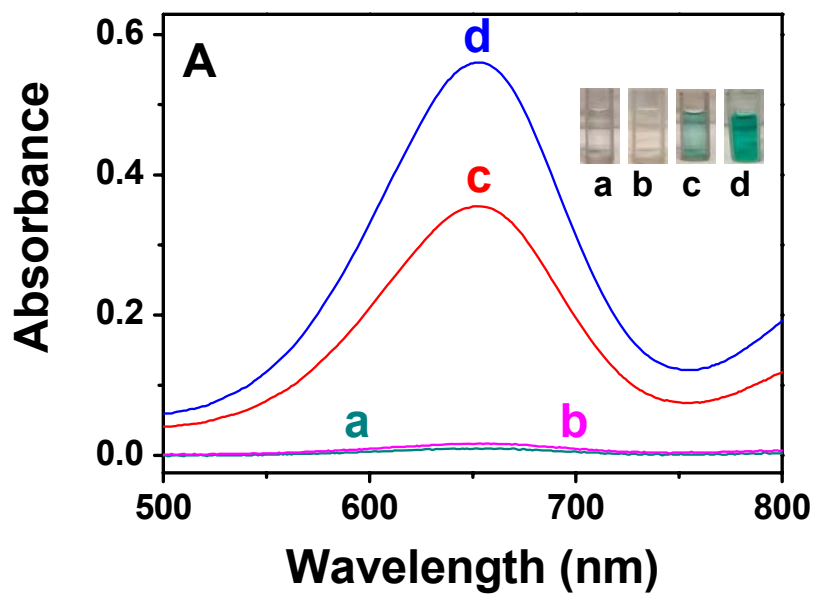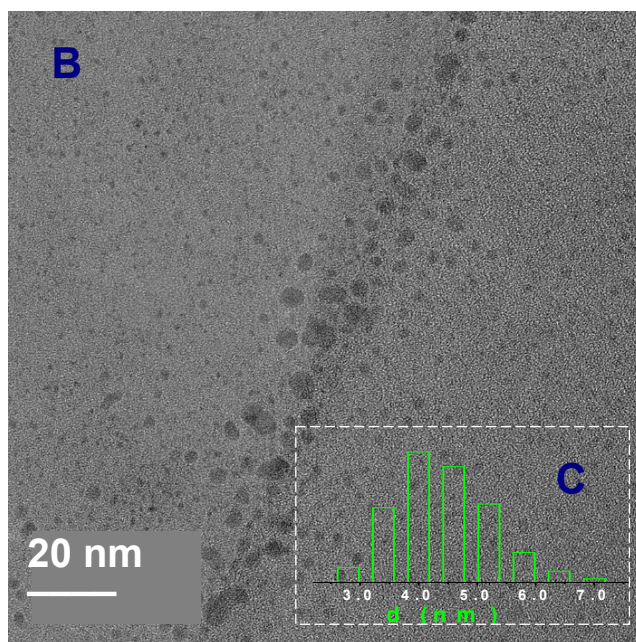

**Fig. S4.** (A) The UV-vis absorption spectra and photos of different systems: (a) TMB-H<sub>2</sub>O<sub>2</sub>; (b) DA-TMB-H<sub>2</sub>O<sub>2</sub>; (c) P@AuNC-TMB-H<sub>2</sub>O<sub>2</sub>; (d) P@AuNC-TMB-H<sub>2</sub>O<sub>2</sub>-DA. (B) TEM image and (C) size distribution of P@AuNCs-DA.

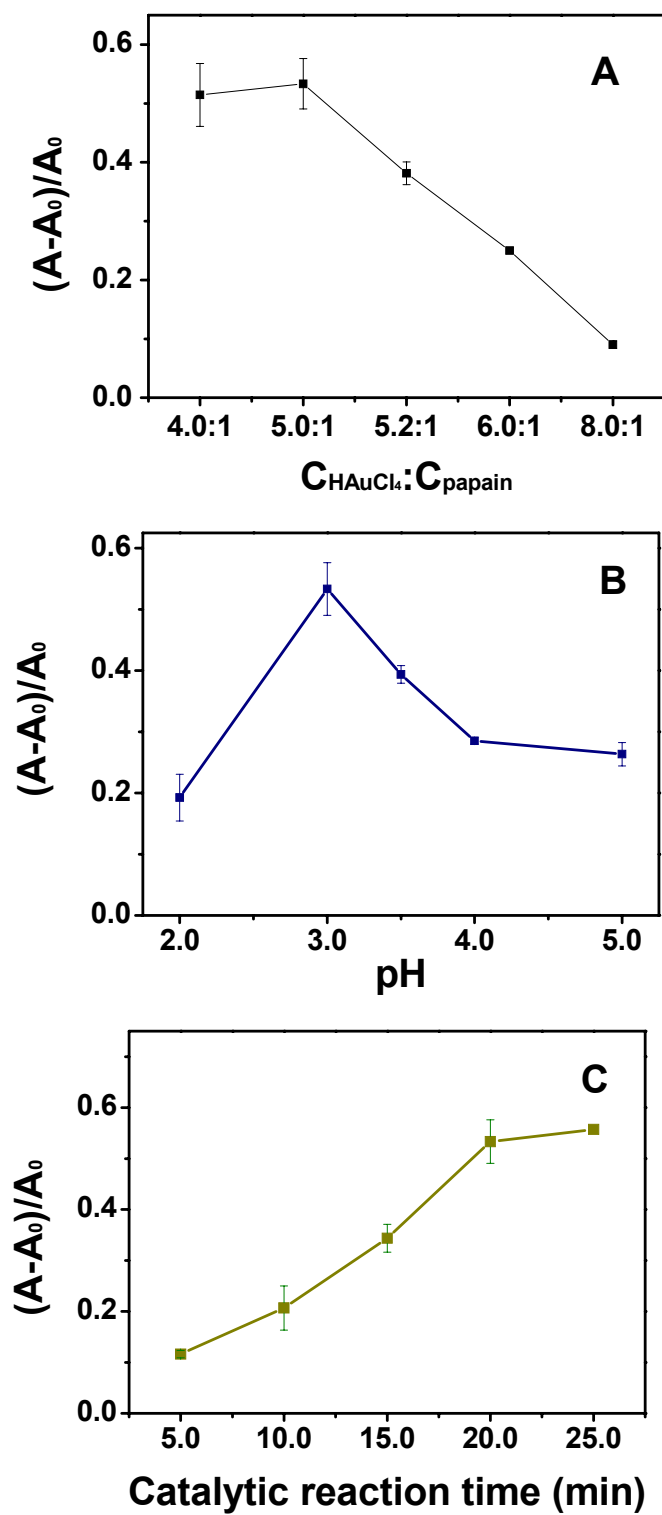

**Fig. S5.** Dependence of the peroxidase-like activity of P@AuNCs on (A) concentration ratio of  $\text{HAuCl}_4$  to papain; (B) buffer pH and (C) catalytic reaction time.

**Table S1.** Kinetic parameters of the nanozymes with TMB as the substrate in the presence of H<sub>2</sub>O<sub>2</sub>

| Catalyst   | $K_m$ (mM) | $V_{max}$ ( $10^{-8} \text{ M}\cdot\text{s}^{-1}$ ) |
|------------|------------|-----------------------------------------------------|
| P@AuNCs    | 0.41       | 0.99                                                |
| P@AuNCs-DA | 4.08       | 18.4                                                |

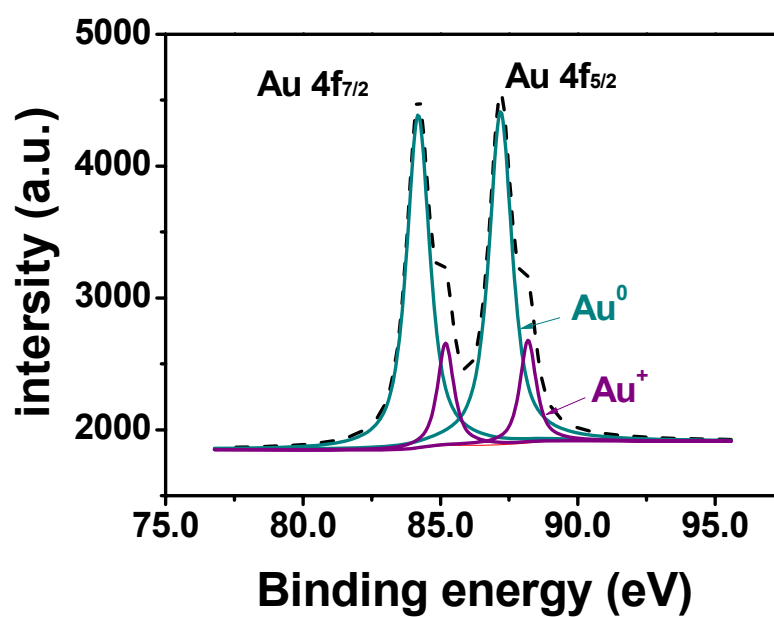

**Fig. S6.** XPS spectra of Au 4f orbitals of P@AuNCs-DA.



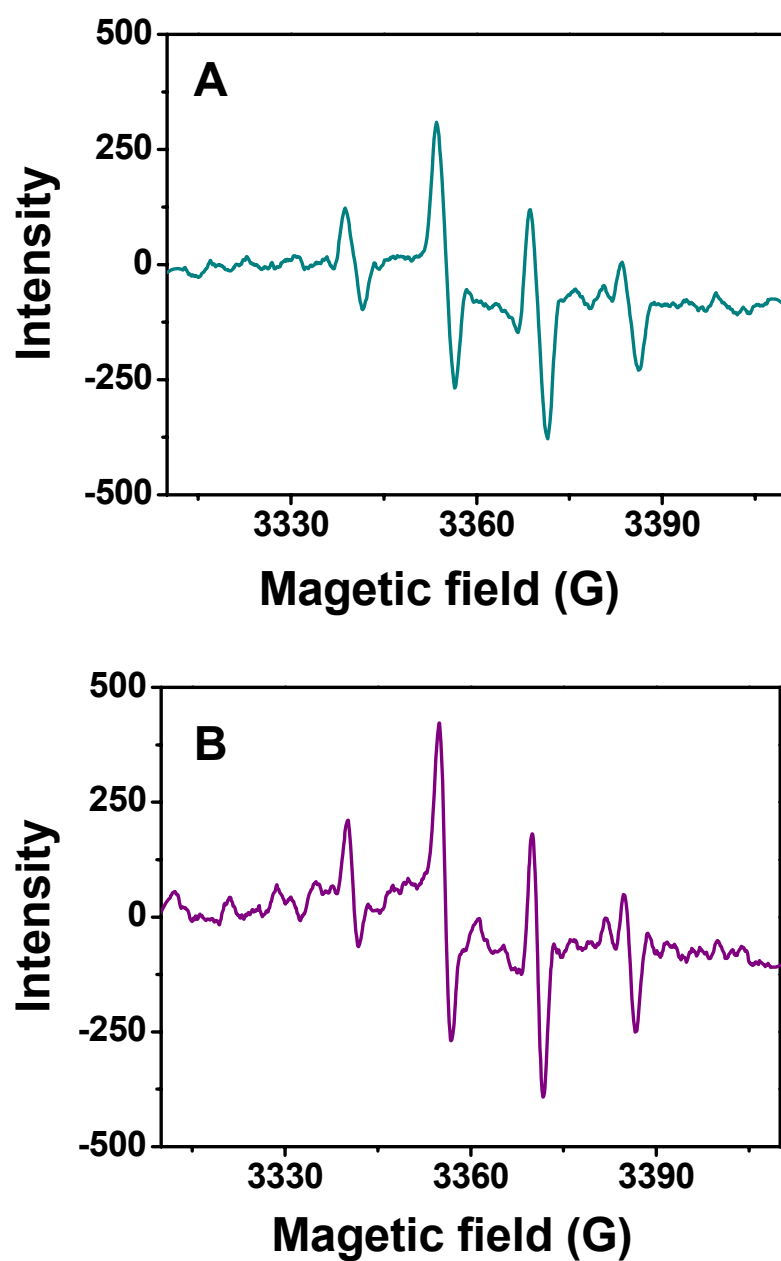

**Fig. S7.** EPR signals of (A) DMPO-H<sub>2</sub>O<sub>2</sub>-P@AuNCs and (B) DMPO-H<sub>2</sub>O<sub>2</sub>-P@AuNCs-DA. The concentrations of DMPO, P@AuNCs, H<sub>2</sub>O<sub>2</sub> and DA were 0.1 M, 0.1 mM, 0.3 M and 25.0  $\mu$ M, respectively.

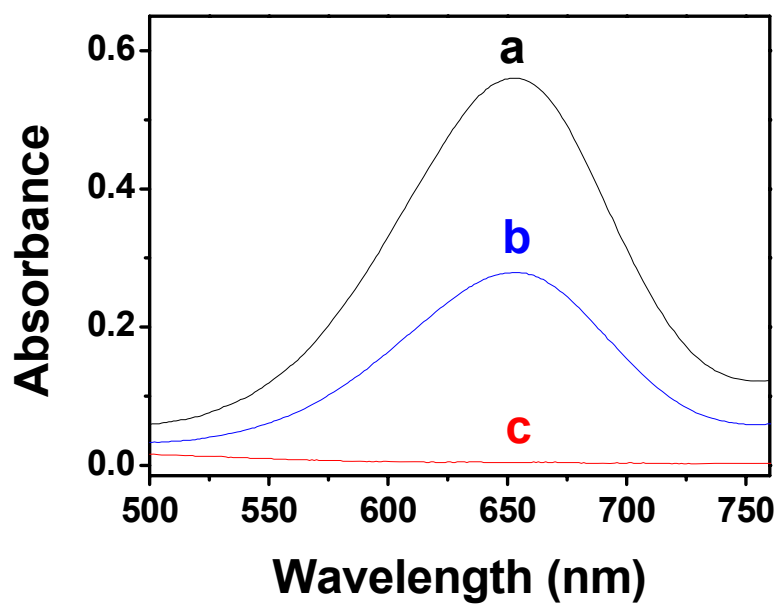

**Fig. S8.** Effect of ROS inhibitors on the P@AuNCs-TMB-H<sub>2</sub>O<sub>2</sub>-DA absorbance in the absence (a) and presence of (b) 0.8 mM t-tubyl alcohol or (c) 0.4 mM benzoquinone.

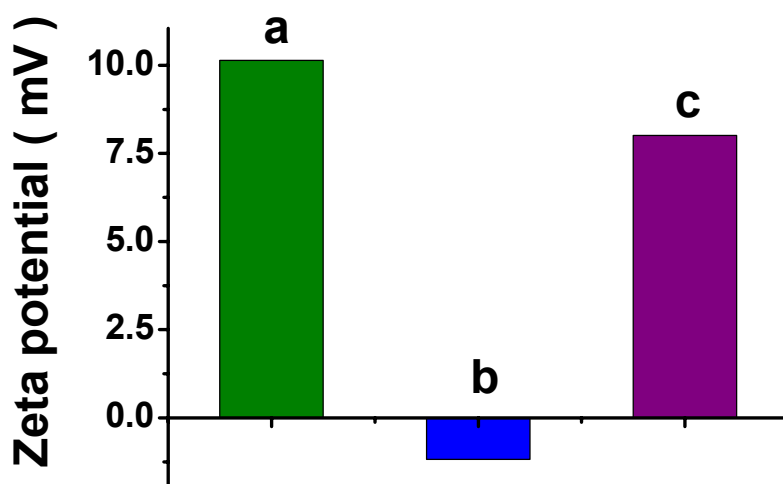

**Fig. S9.** The apparent zeta potentials of (a) P@AuNCs; (b) DA and (c) P@AuNCs-DA, respectively.

**Table S2.** Comparison with the reported nanozymes for detection of DA

| Nanozymes                                                          | Synthesis conditions | Catalytic activity | Linear range ( $\mu\text{M}$ ) | Samples     | References                                                                     |
|--------------------------------------------------------------------|----------------------|--------------------|--------------------------------|-------------|--------------------------------------------------------------------------------|
| $\text{CuFe}_2\text{O}_4 @ \text{Cu}_9\text{S}_8 @ \text{PPy}$ NTs | 25 °C<br>12.0 h      | decrease           | 2.0-20.0                       | DA solution | Z. Yang, et al.<br><i>Dalton Trans.</i><br>2017, 46, 11171.                    |
| $\text{Co}_3\text{O}_4 @ \text{NiO}$ NTs                           | 80 °C<br>1.0 h       | decrease           | 1.0-20.0                       | DA solution | Y. Zhu, et al.<br><i>Talanta</i><br>2018, 181, 431.                            |
| $\text{Ag}_2\text{S} @ \text{CeO}_2$ NPs                           | 25 °C<br>5.0 h       | decrease           | 0.5-4.0                        | DA solution | J. Lian, et al.<br><i>Colloid. Surf. A</i><br>2019, 565, 1.                    |
| $\text{Pt} @ \text{hBNNS}$ NPs                                     | 80 °C<br>20.0 h      | decrease           | 2.0-50.0                       | human serum | M.N. Ivanova, et al.<br><i>ACS Appl. Mater. Interfaces</i><br>2019, 11, 22102. |
| $\text{Pt} @ \text{CoFe}_2\text{O}_4$ NPs                          | 60 °C<br>6.0 h       | decrease           | 20.0-80.0                      | human serum | F. He, et al.<br><i>Microchem. J.</i><br>2020, 158, 105264.                    |
| $\text{ZIF-67} @ \text{Co}_3\text{O}_4$ HNCs                       | 25 °C<br>24.0 h      | decrease           | 4.8-90.0                       | human serum | H. Wang, et al.<br><i>Spectrochim. Acta A</i><br>2021, 246, 119006             |
| $\text{P} @ \text{AuNCs}$                                          | 100 °C<br>0.17 h     | increase           | 2.0-25.0                       | rat serum   | <b>This work</b>                                                               |

**Table S3.** Recovery of the proposed method\*

| Serums   | Added ( $\mu\text{M}$ ) | Found ( $\mu\text{M}$ ) | Recovery (%) | RSD (%) |
|----------|-------------------------|-------------------------|--------------|---------|
| <b>1</b> | 5.0                     | 4.8                     | 97.7         | 0.5     |
|          | 10.0                    | 9.9                     | 99.0         | 3.0     |
|          | 20.0                    | 19.3                    | 96.8         | 3.2     |
| <b>2</b> | 5.0                     | 5.4                     | 108.0        | 0.9     |
|          | 10.0                    | 10.8                    | 107.9        | 3.3     |
|          | 20.0                    | 19.3                    | 96.5         | 3.0     |
| <b>3</b> | 5.0                     | 5.1                     | 102.0        | 1.6     |
|          | 10.0                    | 10.0                    | 100.2        | 1.7     |
|          | 20.0                    | 19.0                    | 95.1         | 1.5     |

\* Blank controlled rat serums were used for recovery study (n=3).
